# Supplementary material for: Comparative Metabologenomics Analysis of Polar Actinomycetes
Source: PubMed Central journal article supplement (PMC7916644; doi:10.3390/md19020103), 2021-02-10
Supplement: marinedrugs-19-00103-s001.pdf [file marinedrugs-19-00103-s001.pdf]

**Table S1:** Isolation and collection data of the 25 polar bacteria.

| Ref. No | Closest type stain        | Polar region | Location                               | Year of collection | Length (cm) | Type    | Depth (m) | Section (B, M, U) |
|---------|---------------------------|--------------|----------------------------------------|--------------------|-------------|---------|-----------|-------------------|
| KRD012  | <i>Micrococcus</i> sp.    | Antarctica   | Antarctic PS61-139                     | N/R                | N/R         | N/R     | N/R       | N/A               |
| KRD022  | <i>Micrococcus</i> sp.    | Antarctica   | PS67-16A, Agullas Basin                | 2005               | N/R         | Box     | 4730      | N/A               |
| KRD026  | <i>Micrococcus</i> sp.    | Antarctica   | PS67-16A, Agullas Basin                | 2005               | N/R         | Box     | 4730      | N/A               |
| KRD070  | <i>Micrococcus</i> sp.    | Arctic       | M5M-75-62-B4, Voring Plateau           | 2002               | N/R         | Gravity | 1358      | N/A               |
| KRD077  | <i>Micrococcus</i> sp.    | Arctic       | M5M-75-62-B4, Voring Plateau           | 2002               | N/R         | Gravity | 1358      | N/A               |
| KRD096  | <i>Micrococcus</i> sp.    | Arctic       | M5M-127b-99b8, Kongsfjord Outer        | 2005               | N/R         | Piston  | 388       | N/A               |
| KRD128  | <i>Micrococcus</i> sp.    | Arctic       | M5M-219-143A, Northern Svalbard Margin | 2007               | N/R         | Piston  | N/R       | N/A               |
| KRD140  | <i>Kocuria</i> sp.        | Antarctica   | Antarctic PS66-88A, Weddell Abyssal P. | 205                | N/R         | multi   | 4932      | N/A               |
| KRD153  | <i>Micrococcus</i> sp.    | Arctic       | M5M-219-142B                           | N/R                | N/R         | N/R     | N/R       | N/R               |
| KRD162  | <i>Rhodococcus</i> sp.    | Antarctica   | PS61 138-8 (BC052-A)                   | 2002               | 38          | Box     | 4539      | B                 |
| KRD168  | <i>Pseudonocardia</i> sp. | Antarctica   | PS61 138-8 (BC052-A)                   | 2002               | 38          | Box     | 4539      | B                 |
| KRD169  | <i>Pseudonocardia</i> sp. | Antarctica   | PS61 138-8 (BC052-A)                   | 2002               | 38          | Box     | 4539      | B                 |
| KRD171  | <i>Halomonas</i> sp.      | Arctic       | JR75 (GC067)                           | 2002               | 77          | Gravity | 1226      | M                 |
| KRD172  | <i>Microbacterium</i> sp. | Arctic       | JR75 (GC067)                           | 2002               | 77          | Gravity | 1226      | M                 |
| KRD174  | <i>Microbacterium</i> sp. | Arctic       | JR75 (GC067)                           | 2002               | 77          | Gravity | 1226      | M                 |
| KRD175  | <i>Rhodococcus</i> sp.    | Arctic       | JR75 (GC067)                           | 2002               | 77          | Gravity | 1226      | B                 |
| KRD176  | <i>Pseudonocardia</i> sp. | Antarctica   | PS61 134-5 (BC043)                     | 2002               | 45.5        | Box     | 4060      | U                 |
| KRD182  | <i>Pseudonocardia</i> sp. | Antarctica   | PS61 134-5 (BC043)                     | 2002               | 45.5        | Box     | 4060      | U                 |
| KRD184  | <i>Pseudonocardia</i> sp. | Antarctica   | PS61 134-5 (BC043)                     | 2002               | 45.5        | Box     | 4060      | M                 |
| KRD185  | <i>Pseudonocardia</i> sp. | Antarctica   | PS61 134-5 (BC043)                     | 2002               | 45.5        | Box     | 4060      | M                 |
| KRD186  | <i>Agrococcus</i> sp.     | Antarctica   | PS61 134-5 (BC043)                     | 2002               | 45.5        | Box     | 4060      | B                 |
| KRD188  | <i>Pseudonocardia</i> sp. | Antarctica   | PS61 134-5 (BC043)                     | 2002               | 45.5        | Box     | 4060      | B                 |
| KRD291  | <i>Pseudonocardia</i> sp. | Antarctica   | PS61 134-5 (BC043)                     | 2002               | 45.5        | Box     | 4060      | B                 |
| KRD197  | <i>Rhodococcus</i> sp.    | Antarctica   | PS61 140-2 (BC055W)                    | 2002               | 16          | Box     | 2946      | U                 |
| KRD202  | <i>Dietzia</i> sp.        | Arctic       | JR219 PC141                            | 2010               | 86.5        | Piston  | N/R       | N/R               |

N/R: Not recorded, N/A: Not Applicable. Section (B, M, U): section of the core where the sample was taken; B: Bottom, M: Middle, U: Upper

[Type here]

**Table S2:** Genome quality of the Polar strains. (*Pseudonocardia* strains were not analysed by MeDuSa as no reference strains were available)

| Strain  | GenBank accession number | Most frequent family (%) | Most frequent species (%)                | Number of reads | GC (%) | Number of contigs | Total length (bp) | N50         |
|---------|--------------------------|--------------------------|------------------------------------------|-----------------|--------|-------------------|-------------------|-------------|
| KRD 012 | SAMN14679891             | Micrococcaceae (86.32)   | <i>Micrococcus luteus</i> (86.13)        | 587934          | 73,14  | 54                | 2428345           | 152950      |
| KRD 022 | SAMN14679892             | Micrococcaceae (87.14)   | <i>Micrococcus luteus</i> (86.94)        | 991624          | 72,5   | 634               | 2708943           | 48082       |
| KRD 026 | SAMN14679893             | Micrococcaceae (84.08)   | <i>Micrococcus luteus</i> (83.67)        | 777451          | 72,72  | 93                | 2630609           | 126029      |
| KRD 070 | SAMN14679894             | Micrococcaceae (84.26)   | <i>Micrococcus luteus</i> (84.04)        | 860196          | 72,96  | 61                | 2506630           | 120226      |
| KRD 077 | SAMN14679895             | Micrococcaceae (86.50)   | <i>Micrococcus luteus</i> (85.18)        | 897931          | 72,79  | 117               | 2553835           | 77566       |
| KRD 096 | SAMN14679896             | Micrococcaceae (87.02)   | <i>Micrococcus luteus</i> (86.67)        | 335398          | 72,99  | 91                | 2499004           | 167875      |
| KRD 128 | SAMN14679897             | Micrococcaceae (85.88)   | <i>Micrococcus luteus</i> (85.37)        | 112082<br>6     | 73,19  | 69                | 2447759           | 166662      |
| KRD 140 | SAMN14679898             | Micrococcaceae (34.9)    | <i>Kocuria rhizophila</i> (32.10)        | 253418          | 68,91  | 36                | 2743959           | 503418      |
| KRD 153 | SAMN14679899             | Micrococcaceae (87.30)   | <i>Micrococcus luteus</i> (87.09)        | 201536<br>7     | 72,87  | 82                | 2546919           | 127028      |
| KRD 162 | SAMN14679900             | Nocardiaceae (10.26)     | <i>Rhodococcus erythropolis</i> (3.16)   | 470260          | 64,22  | 110               | 5901029           | 339827      |
| KRD 171 | SAMN14679901             | Halomonadaceae (2.03)    | <i>Halomonas elongata</i> (1.20)         | 577377          | 54,66  | 57                | 5542288           | 425172      |
| KRD 172 | SAMN14679902             | Microbacteriaceae (7.91) | <i>Microbacterium testaceum</i> (4.77)   | 439847          | 66,7   | 38                | 3362075           | 319652<br>4 |
| KRD 174 | SAMN14679903             | Microbacteriaceae (8.27) | <i>Microbacterium testaceum</i> (4.93)   | 104910<br>2     | 66,53  | 452               | 4823384           | 106614      |
| KRD 175 | SAMN14679904             | Nocardiaceae (9.63)      | <i>Rhodococcus erythropolis</i> (2.55)   | 603595          | 64,67  | 82                | 5449128           | 432516      |
| KRD 186 | SAMN14679905             | Microbacteriaceae (6.32) | <i>Clavibacter michiganensis</i> (3.34)  | 293168          | 70,97  | 29                | 3101783           | 304870<br>3 |
| KRD 197 | SAMN14679906             | Nocardiaceae (7.72)      | <i>Rhodococcus erythropolis</i> (1.59)   | 569376          | 64,12  | 296               | 6781538           | 736182      |
| KRD 202 | SAMN14679907             | Nocardiaceae (5.01)      | <i>Rhodococcus pyridinivorans</i> (0.87) | 772984          | 70,01  | 101               | 5564907           | 341290      |

N50: the length for which the collection of all contigs of that length or longer covers at least half an assembly

[Type here]

**Table S3:** Identified BGCs using antiSMASH 5 clusters after genome scaffolding using MeDuSa

| Strain | Genus          | Total Clusters | NRPS | NRPS-like | Type 1 PKS | Type 2 PKS | Type 3 PKS | hglE-KS | Terpene | Betalactone | Siderophore | Butyrolactone | Arylpolyene | Ectoine | LAP | Lasso peptide | Bacteriocin | Hybrid | Hybrid types                                                          |
|--------|----------------|----------------|------|-----------|------------|------------|------------|---------|---------|-------------|-------------|---------------|-------------|---------|-----|---------------|-------------|--------|-----------------------------------------------------------------------|
| KRD012 | Micrococcus    | 5              | 0    | 1         | 0          | 0          | 0          | 0       | 1       | 1           | 1           | 0             | 0           | 1       | 0   | 0             | 0           | 0      | -                                                                     |
| KRD022 | Micrococcus    | 5              | 0    | 1         | 0          | 0          | 0          | 0       | 1       | 1           | 1           | 0             | 0           | 1       | 0   | 0             | 0           | 0      | -                                                                     |
| KRD026 | Micrococcus    | 6              | 0    | 1         | 0          | 0          | 0          | 0       | 1       | 1           | 1           | 0             | 0           | 1       | 0   | 0             | 0           | 1      | Arylpolyene-NRPS                                                      |
| KRD070 | Micrococcus    | 5              | 0    | 1         | 0          | 0          | 0          | 0       | 1       | 1           | 1           | 0             | 0           | 1       | 0   | 0             | 0           | 0      | -                                                                     |
| KRD077 | Micrococcus    | 5              | 0    | 1         | 0          | 0          | 0          | 0       | 1       | 1           | 1           | 0             | 0           | 1       | 0   | 0             | 0           | 0      | -                                                                     |
| KRD096 | Micrococcus    | 5              | 0    | 1         | 0          | 0          | 0          | 0       | 1       | 1           | 1           | 0             | 0           | 1       | 0   | 0             | 0           | 0      | -                                                                     |
| KRD128 | Micrococcus    | 5              | 0    | 1         | 0          | 0          | 0          | 0       | 1       | 1           | 1           | 0             | 0           | 1       | 0   | 0             | 0           | 0      | -                                                                     |
| KRD140 | Kocuria        | 5              | 0    | 1         | 0          | 0          | 1          | 0       | 1       | 1           | 1           | 0             | 0           | 0       | 0   | 0             | 0           | 0      | -                                                                     |
| KRD153 | Micrococcus    | 5              | 0    | 1         | 0          | 0          | 0          | 0       | 1       | 1           | 1           | 0             | 0           | 1       | 0   | 0             | 0           | 0      | -                                                                     |
| KRD162 | Rhodococcus    | 21             | 8    | 6         | 1          | 0          | 0          | 0       | 2       | 0           | 0           | 1             | 0           | 1       | 0   | 1             | 0           | 1      | Lantipeptide/Ladderane                                                |
| KRD171 | Halomonas      | 4              | 1    | 0         | 1          | 0          | 0          | 0       | 0       | 1           | 0           | 0             | 0           | 1       | 0   | 0             | 0           | 0      | -                                                                     |
| KRD172 | Microbacterium | 5              | 0    | 2         | 0          | 0          | 0          | 0       | 1       | 0           | 0           | 0             | 0           | 1       | 0   | 0             | 0           | 1      | t3PKS/ betalactone                                                    |
| KRD174 | Microbacterium | 5              | 0    | 2         | 0          | 0          | 1          | 0       | 1       | 1           | 0           | 0             | 0           | 0       | 0   | 0             | 0           | 0      | -                                                                     |
| KRD175 | Rhodococcus    | 17             | 6    | 4         | 1          | 0          | 0          | 0       | 2       | 0           | 0           | 1             | 1           | 1       | 0   | 0             | 1           | 0      | -                                                                     |
| KRD186 | Agrococcus     | 5              | 0    | 1         | 0          | 0          | 1          | 0       | 1       | 1           | 0           | 0             | 0           | 1       | 0   | 0             | 0           | 0      | -                                                                     |
| KRD197 | Rhodococcus    | 22             | 10   | 2         | 1          | 1          | 0          | 1       | 2       | 0           | 0           | 0             | 0           | 1       | 1   | 0             | 0           | 3      | Butyrolactone/NRPS, NRPS-like/Arylpolyene, PKS-like/t1PKS/Arylpolyene |
| KRD202 | Dietzia        | 7              | 1    | 1         | 1          | 0          | 0          | 0       | 2       | 0           | 1           | 0             | 0           | 1       | 0   | 0             | 0           | 0      | -                                                                     |

[Type here]

**Table S4:** Bioactive bacterial extracts organised by genus, strain name (KRD) and growth medium ISP3, A1M1, ISP2, and 10-fold dil. TSB. Antibiotic activity against the clinical pathogens *E. faecalis*, *S. aureus*, *K. pneumoniae*, *A. baumannii*, *P. aeruginosa* and *E. coli* is shown as zones of inhibition (cm) and colour coded by inhibition zone size.

| Genus                     | Strain | Growth medium | <i>E. faecalis</i> | <i>S.aureus</i> | <i>K. pneumoniae</i> | <i>A. baumannii</i> | <i>P. aeruginosa</i> | <i>E.coli</i> |
|---------------------------|--------|---------------|--------------------|-----------------|----------------------|---------------------|----------------------|---------------|
| <i>Micrococcus</i> sp.    | KRD026 | ISP2          | -                  | 0,5             | -                    | -                   | -                    | -             |
|                           |        | M1            | -                  | 0,4             | -                    | -                   | -                    | 0,3           |
| <i>Micrococcus</i> sp.    | KRD070 | ISP2          | -                  | 0,3             | -                    | -                   | -                    | 0,1           |
| <i>Micrococcus</i> sp.    | KRD077 | ISP2          | -                  | 0,3             | -                    | 0,1                 | -                    | 0,1           |
|                           |        | ISP3          | -                  | -               | -                    | -                   | 0,2                  | -             |
|                           |        | M1            | -                  | -               | -                    | -                   | 0,3                  | -             |
|                           |        | TSB           | -                  | -               | -                    | -                   | 0,2                  | -             |
| <i>Micrococcus</i> sp.    | KRD096 | ISP2          | -                  | -               | -                    | -                   | 0,1                  |               |
| <i>Micrococcus</i> sp.    | KRD153 | ISP2          | -                  | 0,3             | -                    | -                   | -                    | -             |
|                           |        | M1            | -                  | -               | -                    | -                   | 0,2                  | 0,1           |
|                           |        | TSB           | -                  | -               | -                    | -                   | 0,1                  | -             |
| <i>Pseudonocardia</i> sp. | KRD168 | ISP3          | -                  | 0,7             | -                    | -                   | -                    |               |
| <i>Pseudonocardia</i> sp. | KRD182 | ISP3          | -                  | 0,8             | -                    | -                   | -                    | -             |
|                           |        | TSB           | -                  | 0,7             | -                    | -                   | -                    | -             |
| <i>Pseudonocardia</i> sp. | KRD185 | ISP3          | 0,6                | -               | -                    | -                   | -                    | -             |
|                           |        | M1            | -                  | 2,1             | 0,9                  | 1,5                 | 2,1                  | 0,9           |
| <i>Pseudonocardia</i> sp. | KRD188 | ISP3          | -                  | 0,3             | -                    | -                   | -                    | 0,2           |
| <i>Rhodococcus</i> sp.    | KRD175 | M1            | -                  | -               | 0,4                  | -                   | -                    | -             |
|                           |        | TSB           | -                  | -               | 0,5                  | -                   | -                    | -             |
| <i>Kocuria</i> sp.        | KRD140 | ISP2          | -                  | 0,6             | -                    | -                   | -                    | 0,4           |
|                           |        | ISP3          | -                  | -               | -                    | -                   | -                    | 0,3           |
|                           |        | M1            | -                  | 0,4             | -                    | -                   | -                    | 0,3           |

[Type here]

**Table S5:** Putatively identified metabolites using the Rosetta approach.

| Compound         | GNPS Spectrum ID | GNPS Library ID   | m/z      | Metabolomics Spectrum Resolver URL                                                                                                                                                                                                                                                                                                                                                                                                                                                                                                                                                                                                                                                                                                                                                                                                                                                                                                                                                                                                                                                                                                                                                                                |
|------------------|------------------|-------------------|----------|-------------------------------------------------------------------------------------------------------------------------------------------------------------------------------------------------------------------------------------------------------------------------------------------------------------------------------------------------------------------------------------------------------------------------------------------------------------------------------------------------------------------------------------------------------------------------------------------------------------------------------------------------------------------------------------------------------------------------------------------------------------------------------------------------------------------------------------------------------------------------------------------------------------------------------------------------------------------------------------------------------------------------------------------------------------------------------------------------------------------------------------------------------------------------------------------------------------------|
| Antimycin-like   | 225126           | CCMSLIB0000569369 | 547.3815 | <a href="https://www.google.com/url?q=https://metabolomics-usi.ucsd.edu/mirror?usi1%3Dmzspec:GNPS:TASK-124de327f32f474291a5037f41ac991d-spectra/specs_ms.mgf:scan:225126%26usi2%3Dmzspec:GNPS:GNPS-LIBRARY:accession:CCMSLIB00000569369%26width%3D10.0%26height%3D6.0%26mz_min%3D%26mz_max%3D%26max_intensity%3D150.0%26grid%3Dtrue%26annotate_peaks%3D%5B%5B547.3823%5D,%5B101.0603,219.0767,245.0553,401.2062,547.2642%5D%5D%26annotate_precision%3D4%26annotation_rotation%3D90%26cosine%3Dstandard%26fragment_mz_tolerance%3D0.2&amp;sa=D&amp;ust=1604063429163000&amp;usg=AOvVaw2P1sMf6ulSDwba9JbJ0cB">https://www.google.com/url?q=https://metabolomics-usi.ucsd.edu/mirror?usi1%3Dmzspec:GNPS:TASK-124de327f32f474291a5037f41ac991d-spectra/specs_ms.mgf:scan:225126%26usi2%3Dmzspec:GNPS:GNPS-LIBRARY:accession:CCMSLIB00000569369%26width%3D10.0%26height%3D6.0%26mz_min%3D%26mz_max%3D%26max_intensity%3D150.0%26grid%3Dtrue%26annotate_peaks%3D%5B%5B547.3823%5D,%5B101.0603,219.0767,245.0553,401.2062,547.2642%5D%5D%26annotate_precision%3D4%26annotation_rotation%3D90%26cosine%3Dstandard%26fragment_mz_tolerance%3D0.2&amp;sa=D&amp;ust=1604063429163000&amp;usg=AOvVaw2P1sMf6ulSDwba9JbJ0cB</a> |
| Conglobatin-like | 200494           | CCMSLIB0004710288 | 521.3294 | <a href="https://www.google.com/url?q=https://metabolomics-usi.ucsd.edu/mirror?usi1%3Dmzspec:GNPS:TASK-124de327f32f474291a5037f41ac991d-spectra/specs_ms.mgf:scan:200494%26usi2%3Dmzspec:GNPS:GNPS-LIBRARY:accession:CCMSLIB00004710288%26width%3D10.0%26height%3D6.0%26mz_min%3D%26mz_max%3D%26max_intensity%3D150.0%26grid%3Dtrue%26annotate_peaks%3D%5B%5B204.8952,284.0693,521.329%5D,%5B521.2615%5D%5D%26annotate_precision%3D4%26annotation_rotation%3D90%26cosine%3Dstandard%26fragment_mz_tolerance%3D0.2&amp;sa=D&amp;ust=1604063429168000&amp;usg=AOvVaw0ECRKh1MCwlwrowwvMXBYK">https://www.google.com/url?q=https://metabolomics-usi.ucsd.edu/mirror?usi1%3Dmzspec:GNPS:TASK-124de327f32f474291a5037f41ac991d-spectra/specs_ms.mgf:scan:200494%26usi2%3Dmzspec:GNPS:GNPS-LIBRARY:accession:CCMSLIB00004710288%26width%3D10.0%26height%3D6.0%26mz_min%3D%26mz_max%3D%26max_intensity%3D150.0%26grid%3Dtrue%26annotate_peaks%3D%5B%5B204.8952,284.0693,521.329%5D,%5B521.2615%5D%5D%26annotate_precision%3D4%26annotation_rotation%3D90%26cosine%3Dstandard%26fragment_mz_tolerance%3D0.2&amp;sa=D&amp;ust=1604063429168000&amp;usg=AOvVaw0ECRKh1MCwlwrowwvMXBYK</a>                                     |
| Ectoine          | 219769           | CCMSLIB0000218169 | 185.1012 | <a href="https://www.google.com/url?q=https://metabolomics-usi.ucsd.edu/mirror?usi1%3Dmzspec:GNPS:TASK-124de327f32f474291a5037f41ac991d-spectra/specs_ms.mgf:scan:219769%26usi2%3Dmzspec:GNPS:GNPS-LIBRARY:accession:CCMSLIB00000218169%26width%3D10.0%26height%3D6.0%26mz_min%3D%26mz_max%3D%26max_intensity%3D150.0%26grid%3Dtrue%26annotate_peaks%3D%5B%5B125.0711,143.0816%5D,%5B143.1%5D%5D%26annotate_precision%3D4%26annotation_rotation%3D90%26cosine%3Dstandard%26fragment_mz_tolerance%3D0.2&amp;sa=D&amp;ust=1604063428992000&amp;usg=AOvVaw2f3CK1d6FsQ3zgieEJNFYV">https://www.google.com/url?q=https://metabolomics-usi.ucsd.edu/mirror?usi1%3Dmzspec:GNPS:TASK-124de327f32f474291a5037f41ac991d-spectra/specs_ms.mgf:scan:219769%26usi2%3Dmzspec:GNPS:GNPS-LIBRARY:accession:CCMSLIB00000218169%26width%3D10.0%26height%3D6.0%26mz_min%3D%26mz_max%3D%26max_intensity%3D150.0%26grid%3Dtrue%26annotate_peaks%3D%5B%5B125.0711,143.0816%5D,%5B143.1%5D%5D%26annotate_precision%3D4%26annotation_rotation%3D90%26cosine%3Dstandard%26fragment_mz_tolerance%3D0.2&amp;sa=D&amp;ust=1604063428992000&amp;usg=AOvVaw2f3CK1d6FsQ3zgieEJNFYV</a>                                                           |

[Type here]

|                 |        |                   |          |                                                                                                                                                                                                                                                                                                                                                                                                                                                                                                                                                                                                                                                                                                                                                                                                                                                                                                                                                                                                                                                                                                                                                         |
|-----------------|--------|-------------------|----------|---------------------------------------------------------------------------------------------------------------------------------------------------------------------------------------------------------------------------------------------------------------------------------------------------------------------------------------------------------------------------------------------------------------------------------------------------------------------------------------------------------------------------------------------------------------------------------------------------------------------------------------------------------------------------------------------------------------------------------------------------------------------------------------------------------------------------------------------------------------------------------------------------------------------------------------------------------------------------------------------------------------------------------------------------------------------------------------------------------------------------------------------------------|
| Chloramphenicol | 111427 | CCMSLIB0004710288 | 380.2794 | <a href="https://www.google.com/url?q=https://metabolomics-usi.ucsd.edu/mirror?usi1%3Dmzspec:GNPS:TASK-124de327f32f474291a5037f41ac991d-spectra/specs_ms.mgf:scan:219769%26usi2%3Dmzspec:GNPS:GNPS-LIBRARY:accession:CCMSLIB00000218169%26width%3D10.0%26height%3D6.0%26mz_min%3D%26mz_max%3D%26max_intensity%3D150.0%26grid%3Dtrue%26annotate_peaks%3D%5B%5B125.0711,143.0816%5D,%5B143.1%5D%5D%26annotate_precision%3D4%26annotation_rotation%3D90%26cosine%3Dstandard%26fragment_mz_tolerance%3D0.2&amp;sa=D&amp;ust=1604063428992000&amp;usg=AOvVaw2f3CK1d6FsQ3zgieEJNFYV">https://www.google.com/url?q=https://metabolomics-usi.ucsd.edu/mirror?usi1%3Dmzspec:GNPS:TASK-124de327f32f474291a5037f41ac991d-spectra/specs_ms.mgf:scan:219769%26usi2%3Dmzspec:GNPS:GNPS-LIBRARY:accession:CCMSLIB00000218169%26width%3D10.0%26height%3D6.0%26mz_min%3D%26mz_max%3D%26max_intensity%3D150.0%26grid%3Dtrue%26annotate_peaks%3D%5B%5B125.0711,143.0816%5D,%5B143.1%5D%5D%26annotate_precision%3D4%26annotation_rotation%3D90%26cosine%3Dstandard%26fragment_mz_tolerance%3D0.2&amp;sa=D&amp;ust=1604063428992000&amp;usg=AOvVaw2f3CK1d6FsQ3zgieEJNFYV</a> |
|-----------------|--------|-------------------|----------|---------------------------------------------------------------------------------------------------------------------------------------------------------------------------------------------------------------------------------------------------------------------------------------------------------------------------------------------------------------------------------------------------------------------------------------------------------------------------------------------------------------------------------------------------------------------------------------------------------------------------------------------------------------------------------------------------------------------------------------------------------------------------------------------------------------------------------------------------------------------------------------------------------------------------------------------------------------------------------------------------------------------------------------------------------------------------------------------------------------------------------------------------------|

[Type here]

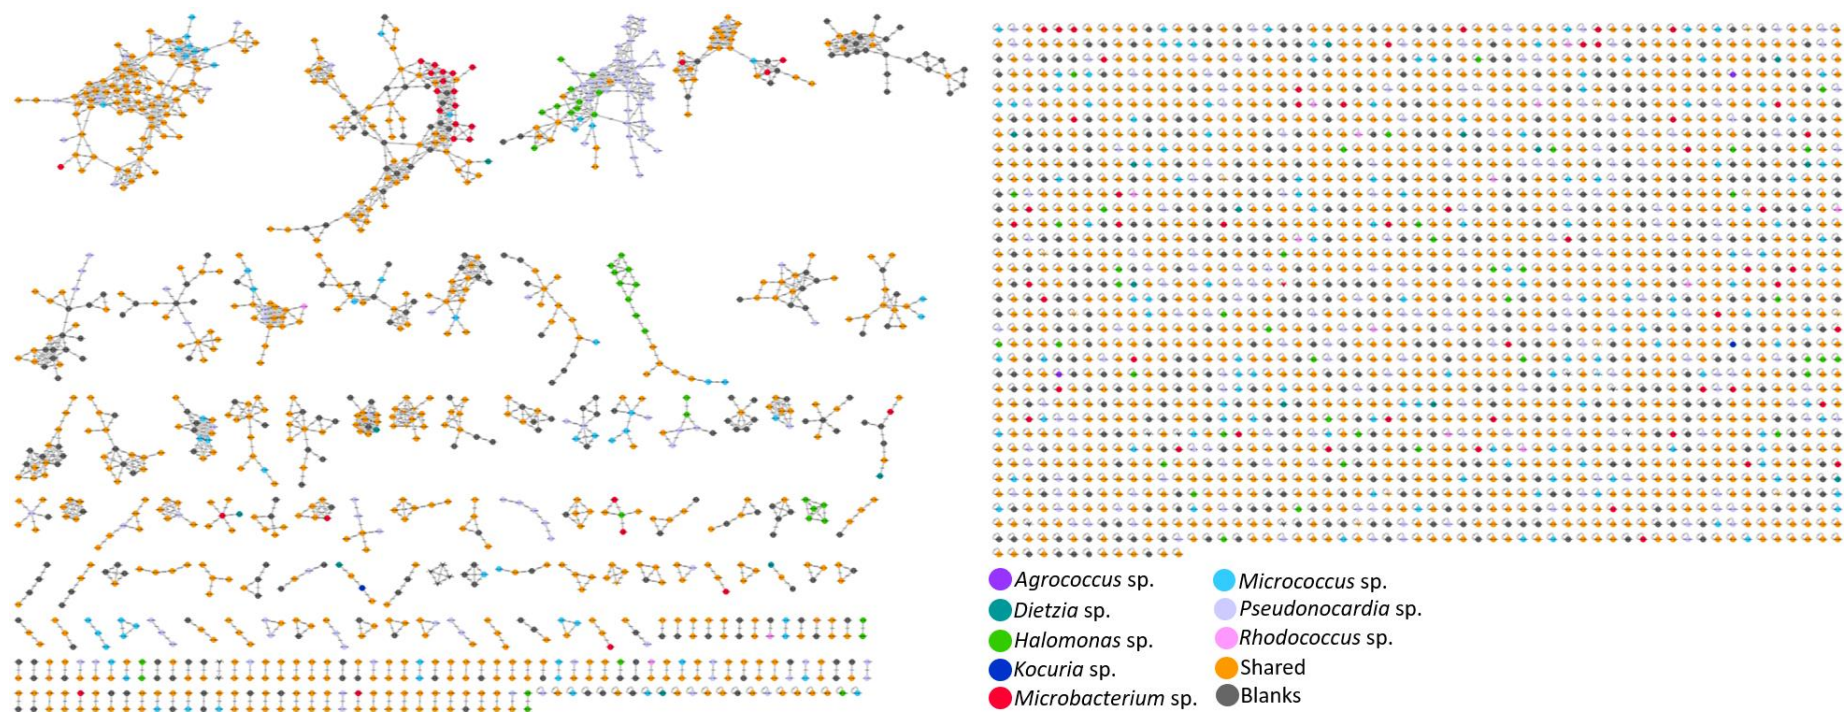

**Figure S1:** Molecular network of 3107 parent ions produced by 25 Polar actinomycete strains. Nodes are colour-coded based on genus: *Agroccoccus*, *Dietzia*, *Halomonas*, *Kocuria*, *Microbacterium*, *Micrococcus*, *Pseudonocardia* and *Rhodococcus*. Grey nodes represent media components whereas orange nodes represent parent ions that are produced by more than one different medium.

[Type here]

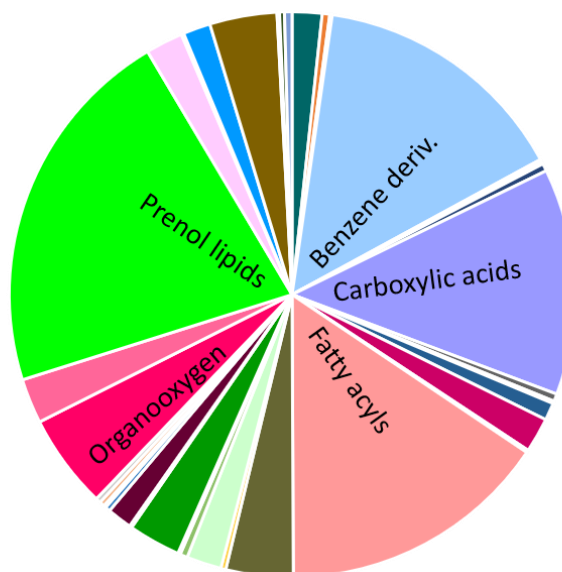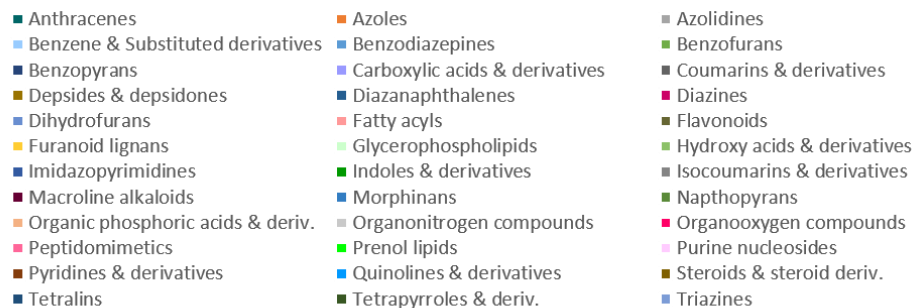

**Figure S2:** Pie chart showing the distribution of parent ions (%) between the 36 chemical class terms shown in the legend as annotated by MolNetEnhancer. The percentage of parent ions with no chemical class match (70.5%) is not shown in the pie chart. Each class has been colour coded to match the molecular network generated through MolNetEnhancer workflow analysis (Figure 5B)

[Type here]
